# Supplementary material
Source: ML conference proceedings conference paper supplement (https://openreview.net/forum?id=qxzOEy9fLU)

— Standard RLHF    — Ensemble RLHF (mean)    — Ensemble RLHF (pessimistic)    — Uncertainty-Aware RLHF (ours)

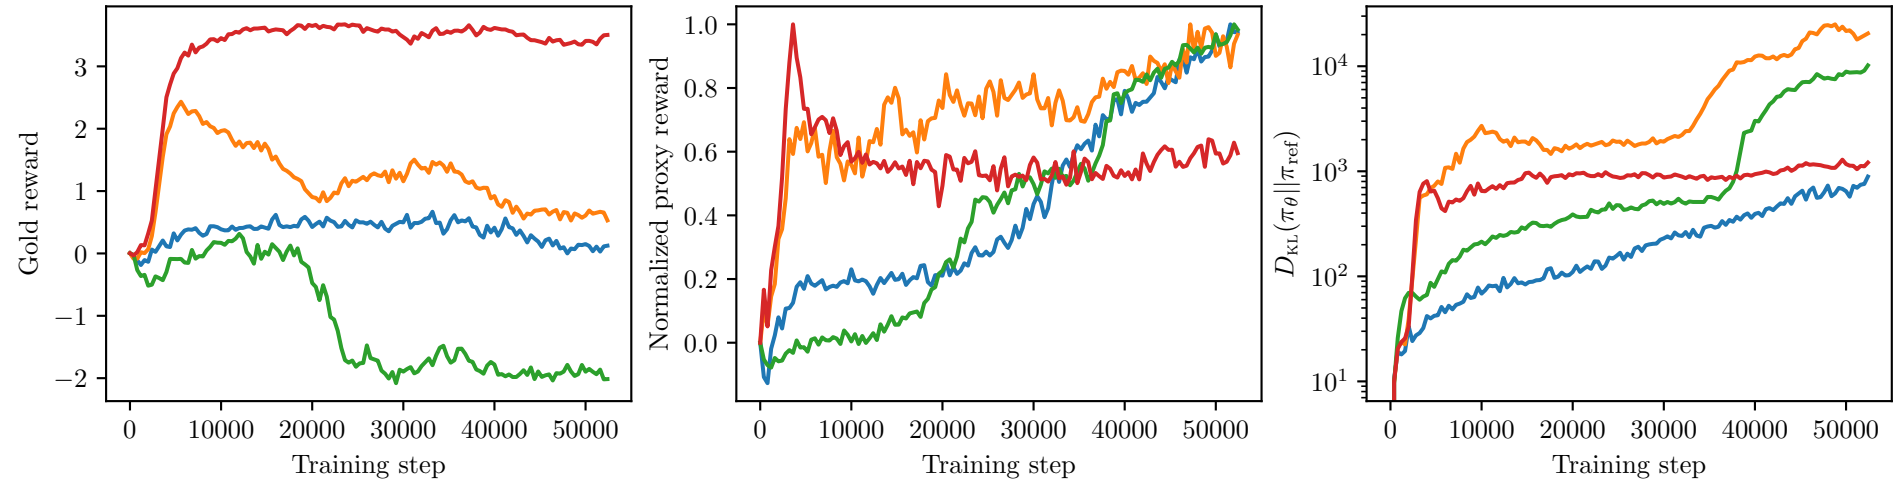

Supplement: supplementary_material [file attachment]

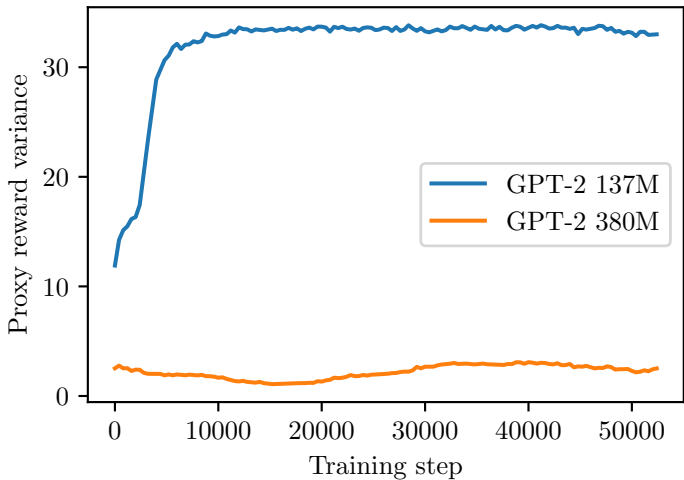

Supplement: supplementary_material [file attachment]

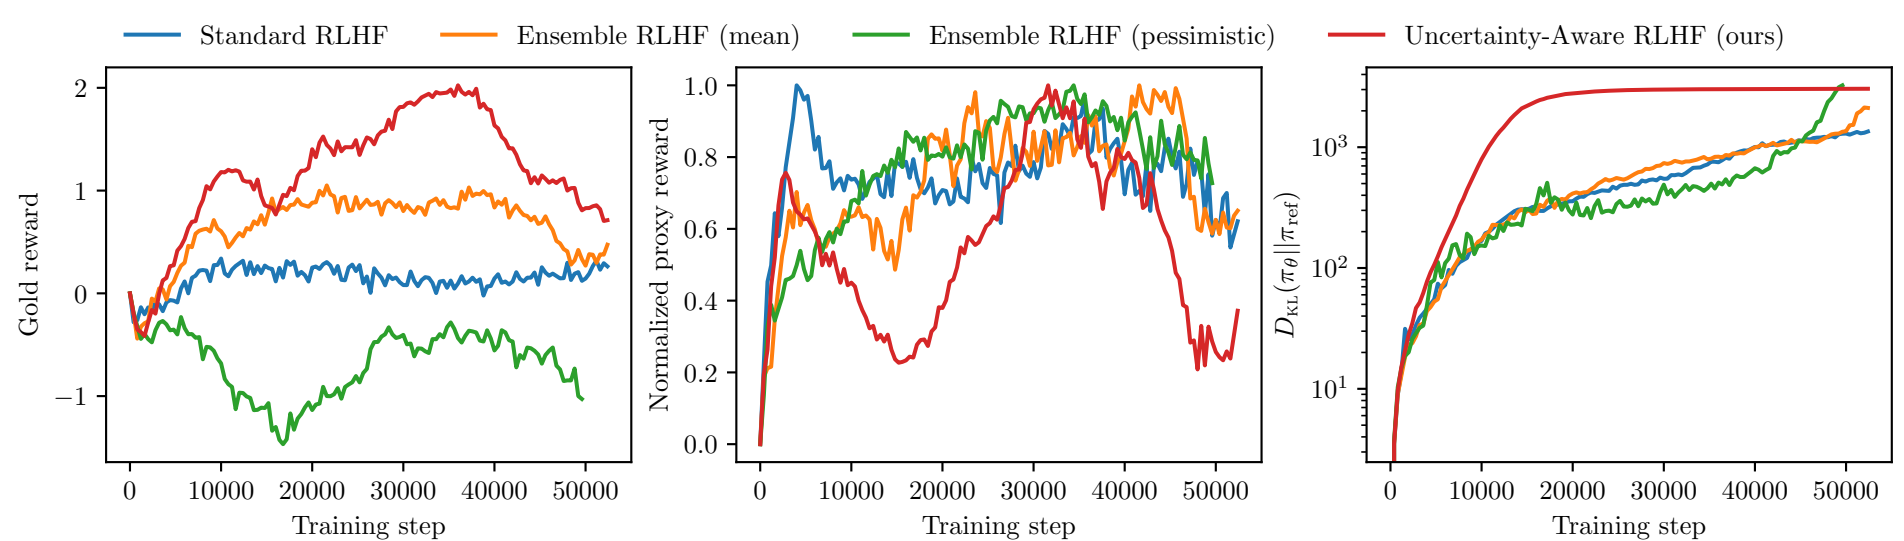

Supplement: supplementary_material [file attachment]

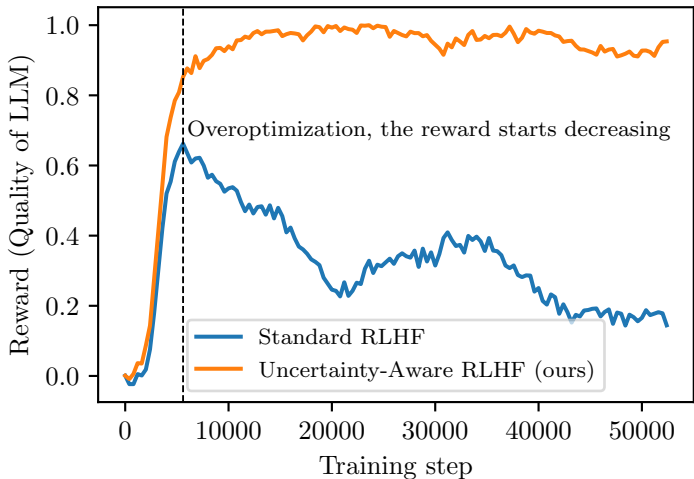

Supplement: supplementary_material [file attachment]
